# Supplementary material
Source: publisher figshare collection journal article supplement (https://acs.figshare.com/ndownloader/files/11791310)
Supplement: Supplementary file 1 [file 11791310]

data_He D2O Hydrate
_ccdc_journal_manuscript_code    JPCLCD
_publ_requested_journal          j.Phys
_publ_contact_author_name        'Werner F. Kuhs'
_publ_contact_author_address     
'GZG Abt. Kristallographie, Universit\"at G\"ottingen, Goldschmidtstr. 1, 37077 G\"ottingen, Germany'
_publ_contact_author_email       wkuhs1@gwdg.de
loop_
_publ_author_name
_publ_author_address
'Kuhs, Werner F.'
'GZG Abt. Kristallographie, Universit\"at G\"ottingen, Goldschmidtstr. 1, 37077 G\"ottingen, Germany'
'Hansen, Thomas C.'
'Institut Laue-Langevin (ILL), 6 rue Jules Horowitz, BP 156, 38042 Grenoble Cedex, France'
'Falenty, Andrzej'
'GZG Abt. Kristallographie, Universit\"at G\"ottingen, Goldschmidtstr. 1, 37077 G\"ottingen, Germany'
_audit_creation_method           GSASII
_audit_creation_date             2018-05-03
_audit_update_record             2018-05-03
_journal_coden_ASTM              JPCLCD
_journal_year                    2018
_publ_section_title
;
Filling ices with helium and the formation of helium clathrate hydrate
;
_chemical_formula_sum	'O17 D34 He1.482'
_chemical_compound_source        synthetic
_chemical_formula_analytical     'He D2O'
_chemical_name_structure_type    'sII'
_chemical_name_mineral           'deuterated delium clathrate hydrate'

_diffrn_ambient_temperature      79.5
_diffrn_ambient_pressure         100000
_diffrn_radiation_probe          neutrons
_diffrn_radiation_type           mono
_diffrn_radiation_wavelength     2.41
_diffrn_source                   'nuclear reactor'
_diffrn_source_type              'D20, ILL'


_chemical_formula_weight	346.401
_cell_length_a	                17.0763
_cell_length_b	                17.0763
_cell_length_c	                17.0763
_cell_angle_alpha	        90.00()
_cell_angle_beta	        90.00()
_cell_angle_gamma	        90.00()
_cell_volume	                4979.5(0)
_cell_formula_units_Z	        8
_symmetry_int_tables_number	227
_symmetry_space_group_name_H-M	'F d -3 m'
_symmetry_space_group_name_Hall	'-F_4vw_2vw_3'

loop_
_symmetry_equiv_pos_site_id
_symmetry_equiv_pos_as_xyz
1 x,y,z
2 -y,1/4+x,1/4+z
3 1/4-x,1/4-y,z
4 1/4+y,-x,1/4+z
5 1/4+x,-z,1/4+y
6 x,1/4-y,1/4-z
7 1/4+x,1/4+z,-y
8 1/4+z,1/4+y,-x
9 1/4-x,y,1/4-z
10 -z,1/4+y,1/4+x
11 z,x,y
12 y,z,x
13 1/4-y,1/4-z,x
14 z,1/4-x,1/4-y
15 1/4-y,z,1/4-x
16 1/4-z,1/4-x,y
17 1/4-z,x,1/4-y
18 y,1/4-z,1/4-x
19 1/4+y,1/4+x,-z
20 -y,-x,-z
21 -x,1/4+z,1/4+y
22 -x,-z,-y
23 1/4+z,-y,1/4+x
24 -z,-y,-x
25 -x,-y,-z
26 y,1/4-x,1/4-z
27 1/4+x,1/4+y,-z
28 1/4-y,x,1/4-z
29 1/4-x,z,1/4-y
30 -x,1/4+y,1/4+z
31 1/4-x,1/4-z,y
32 1/4-z,1/4-y,x
33 1/4+x,-y,1/4+z
34 z,1/4-y,1/4-x
35 -z,-x,-y
36 -y,-z,-x
37 1/4+y,1/4+z,-x
38 -z,1/4+x,1/4+y
39 1/4+y,-z,1/4+x
40 1/4+z,1/4+x,-y
41 1/4+z,-x,1/4+y
42 -y,1/4+z,1/4+x
43 1/4-y,1/4-x,z
44 y,x,z
45 x,1/4-z,1/4-y
46 x,z,y
47 1/4-z,y,1/4-x
48 z,y,x
49 x,1/2+y,1/2+z
50 -y,3/4+x,3/4+z
51 1/4-x,3/4-y,1/2+z
52 1/4+y,1/2-x,3/4+z
53 1/4+x,1/2-z,3/4+y
54 x,3/4-y,3/4-z
55 1/4+x,3/4+z,1/2-y
56 1/4+z,3/4+y,1/2-x
57 1/4-x,1/2+y,3/4-z
58 -z,3/4+y,3/4+x
59 z,1/2+x,1/2+y
60 y,1/2+z,1/2+x
61 1/4-y,3/4-z,1/2+x
62 z,3/4-x,3/4-y
63 1/4-y,1/2+z,3/4-x
64 1/4-z,3/4-x,1/2+y
65 1/4-z,1/2+x,3/4-y
66 y,3/4-z,3/4-x
67 1/4+y,3/4+x,1/2-z
68 -y,1/2-x,1/2-z
69 -x,3/4+z,3/4+y
70 -x,1/2-z,1/2-y
71 1/4+z,1/2-y,3/4+x
72 -z,1/2-y,1/2-x
73 -x,1/2-y,1/2-z
74 y,3/4-x,3/4-z
75 1/4+x,3/4+y,1/2-z
76 1/4-y,1/2+x,3/4-z
77 1/4-x,1/2+z,3/4-y
78 -x,3/4+y,3/4+z
79 1/4-x,3/4-z,1/2+y
80 1/4-z,3/4-y,1/2+x
81 1/4+x,1/2-y,3/4+z
82 z,3/4-y,3/4-x
83 -z,1/2-x,1/2-y
84 -y,1/2-z,1/2-x
85 1/4+y,3/4+z,1/2-x
86 -z,3/4+x,3/4+y
87 1/4+y,1/2-z,3/4+x
88 1/4+z,3/4+x,1/2-y
89 1/4+z,1/2-x,3/4+y
90 -y,3/4+z,3/4+x
91 1/4-y,3/4-x,1/2+z
92 y,1/2+x,1/2+z
93 x,3/4-z,3/4-y
94 x,1/2+z,1/2+y
95 1/4-z,1/2+y,3/4-x
96 z,1/2+y,1/2+x
97 1/2+x,y,1/2+z
98 1/2-y,1/4+x,3/4+z
99 3/4-x,1/4-y,1/2+z
100 3/4+y,-x,3/4+z
101 3/4+x,-z,3/4+y
102 1/2+x,1/4-y,3/4-z
103 3/4+x,1/4+z,1/2-y
104 3/4+z,1/4+y,1/2-x
105 3/4-x,y,3/4-z
106 1/2-z,1/4+y,3/4+x
107 1/2+z,x,1/2+y
108 1/2+y,z,1/2+x
109 3/4-y,1/4-z,1/2+x
110 1/2+z,1/4-x,3/4-y
111 3/4-y,z,3/4-x
112 3/4-z,1/4-x,1/2+y
113 3/4-z,x,3/4-y
114 1/2+y,1/4-z,3/4-x
115 3/4+y,1/4+x,1/2-z
116 1/2-y,-x,1/2-z
117 1/2-x,1/4+z,3/4+y
118 1/2-x,-z,1/2-y
119 3/4+z,-y,3/4+x
120 1/2-z,-y,1/2-x
121 1/2-x,-y,1/2-z
122 1/2+y,1/4-x,3/4-z
123 3/4+x,1/4+y,1/2-z
124 3/4-y,x,3/4-z
125 3/4-x,z,3/4-y
126 1/2-x,1/4+y,3/4+z
127 3/4-x,1/4-z,1/2+y
128 3/4-z,1/4-y,1/2+x
129 3/4+x,-y,3/4+z
130 1/2+z,1/4-y,3/4-x
131 1/2-z,-x,1/2-y
132 1/2-y,-z,1/2-x
133 3/4+y,1/4+z,1/2-x
134 1/2-z,1/4+x,3/4+y
135 3/4+y,-z,3/4+x
136 3/4+z,1/4+x,1/2-y
137 3/4+z,-x,3/4+y
138 1/2-y,1/4+z,3/4+x
139 3/4-y,1/4-x,1/2+z
140 1/2+y,x,1/2+z
141 1/2+x,1/4-z,3/4-y
142 1/2+x,z,1/2+y
143 3/4-z,y,3/4-x
144 1/2+z,y,1/2+x
145 1/2+x,1/2+y,z
146 1/2-y,3/4+x,1/4+z
147 3/4-x,3/4-y,z
148 3/4+y,1/2-x,1/4+z
149 3/4+x,1/2-z,1/4+y
150 1/2+x,3/4-y,1/4-z
151 3/4+x,3/4+z,-y
152 3/4+z,3/4+y,-x
153 3/4-x,1/2+y,1/4-z
154 1/2-z,3/4+y,1/4+x
155 1/2+z,1/2+x,y
156 1/2+y,1/2+z,x
157 3/4-y,3/4-z,x
158 1/2+z,3/4-x,1/4-y
159 3/4-y,1/2+z,1/4-x
160 3/4-z,3/4-x,y
161 3/4-z,1/2+x,1/4-y
162 1/2+y,3/4-z,1/4-x
163 3/4+y,3/4+x,-z
164 1/2-y,1/2-x,-z
165 1/2-x,3/4+z,1/4+y
166 1/2-x,1/2-z,-y
167 3/4+z,1/2-y,1/4+x
168 1/2-z,1/2-y,-x
169 1/2-x,1/2-y,-z
170 1/2+y,3/4-x,1/4-z
171 3/4+x,3/4+y,-z
172 3/4-y,1/2+x,1/4-z
173 3/4-x,1/2+z,1/4-y
174 1/2-x,3/4+y,1/4+z
175 3/4-x,3/4-z,y
176 3/4-z,3/4-y,x
177 3/4+x,1/2-y,1/4+z
178 1/2+z,3/4-y,1/4-x
179 1/2-z,1/2-x,-y
180 1/2-y,1/2-z,-x
181 3/4+y,3/4+z,-x
182 1/2-z,3/4+x,1/4+y
183 3/4+y,1/2-z,1/4+x
184 3/4+z,3/4+x,-y
185 3/4+z,1/2-x,1/4+y
186 1/2-y,3/4+z,1/4+x
187 3/4-y,3/4-x,z
188 1/2+y,1/2+x,z
189 1/2+x,3/4-z,1/4-y
190 1/2+x,1/2+z,y
191 3/4-z,1/2+y,1/4-x
192 1/2+z,1/2+y,x

loop_
_atom_type_symbol
_atom_type_oxidation_number
_atom_type_radius_bond
O	?	?
D	?	?
He	?	?


loop_
_atom_site_label
_atom_site_type_symbol
_atom_site_fract_x
_atom_site_fract_y
_atom_site_fract_z
_atom_site_occupancy
_atom_site_symmetry_multiplicity
_atom_site_Wyckoff_symbol
_atom_site_attached_hydrogens
_atom_site_calc_flag
_atom_site_thermal_displace_type
_atom_site_u_iso_or_equiv
O1 O  0.8750  0.8750  0.8750  1.000 8 a ? d Uiso  0.07500
O2 O  0.7825  0.7825  0.7825  1.000 32 e ? d Uiso  0.06962
O3 O  0.8176  0.8176  0.6298  1.000 96 g ? d Uiso  0.07847
D1 D  0.8421  0.8421  0.8421  0.500 32 e ? d Uiso  0.08907
D2 D  0.8160  0.8160  0.8160  0.500 32 e ? d Uiso  0.08530
D3 D  0.7953  0.7953  0.7278  0.500 96 g ? d Uiso  0.08633
D4 D  0.8047  0.8047  0.6847  0.500 96 g ? d Uiso  0.08907
D5 D  0.8586  0.8586  0.6286  0.500 96 g ? d Uiso  0.08719
D6 D  0.7307  0.8550  0.5878  0.500 192 i ? d Uiso  0.08694
He10 He  0.0000  0.0000  0.0000  0.647(47) 16 c 1 d Uiso  0.25600
He11 He  0.4247  0.4247  0.4247  0.622(32) 32 e 1 d Uiso  0.30800
